# Supplementary material for: Vitamin D supplement for patients with early-stage chronic lymphocytic leukemia is associated with a longer time to first treatment
Source: PubMed Central journal article supplement — Blood Adv. 2024 May 7;8(14):3840–6. doi: 10.1182/bloodadvances.2023011458 (PMC11318322; doi:10.1182/bloodadvances.2023011458), 2024-05-07
Supplement: BLOODA_ADV-2023-011458-mmc1.pdf [file BLOODA_ADV-2023-011458-mmc1.pdf]

Table S1: Vitamin D Exposure of Patients during the follow-up period (in months of exposure)

| <b>Vitamin D dose</b> | <b># Months of Exposure</b> |
|-----------------------|-----------------------------|
| 0 (no exposure)       | 199582 (79.35%)             |
| 200                   | 22118 (8.79%)               |
| 400                   | 16441 (6.54%)               |
| 600                   | 4111 (1.63%)                |
| 800                   | 3039 (1.21%)                |
| 1000                  | 1921 (0.76%)                |
| 1200                  | 980 (0.39%)                 |
| 1400                  | 304 (0.12%)                 |
| 1600                  | 178 (0.07%)                 |
| 2000 or more          | 2838 (1.13%)                |

Table S2: The classification of vitamin D deficiency according to the first 25-hydroxyvitamin D serum test performed during the follow-up period and the hazzard ratio of the vitamin D supplement dose.

| <b>Class</b>                  | <b># Patients</b> | <b>Vit D Supp, Hazzard Ratio</b> | <b>p-value</b> |
|-------------------------------|-------------------|----------------------------------|----------------|
| Deficiency (<10 ng/mL)        | 190               | 0.933 [0.827-1.039]              | 0.156          |
| Hypovitaminosis (10-32 ng/mL) | 1602              | 0.871 [0.792-0.958]              | 0.004          |
| Sufficiently (32-100 ng/mL)   | 301               | 0.955 [0.866-1.05]               | 0.164          |
| Toxicity (>100 ng/mL)         | 2                 | NA                               |                |
| Never tested                  | 1379              | 0.947 [0.881-1.013]              | 0.126          |
